# Supplementary material for: Human promoter directionality is determined by transcriptional initiation and the opposing activities of INTS11 and CDK9
Source: eLife journal article supplement (doi:10.7554/elife.92764), 2024-02-12

FIGURE 1A

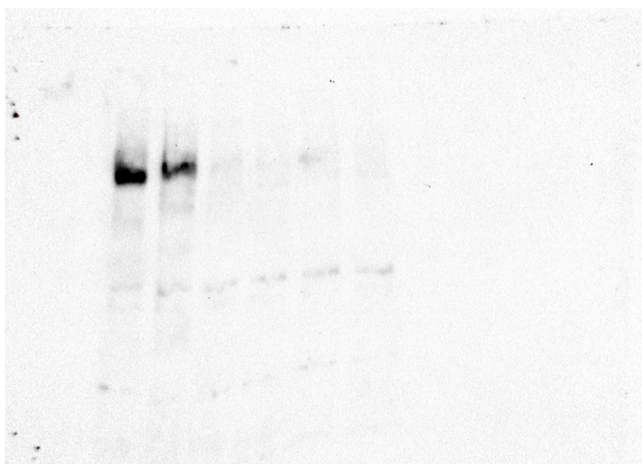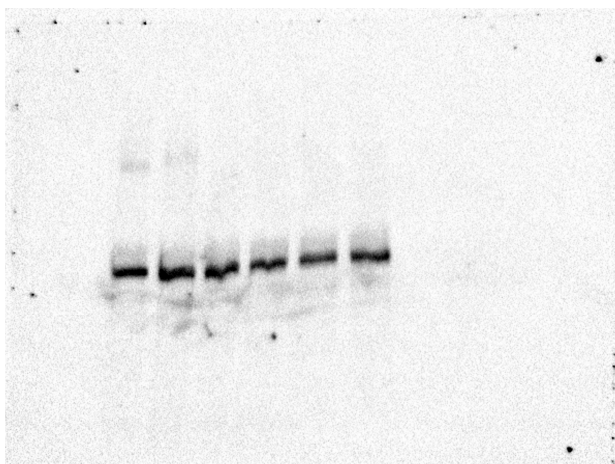

Supplement: fig1-data1 [file elife-92764-fig1-data1-v1.pdf]
