# Supplementary material for: Human promoter directionality is determined by transcriptional initiation and the opposing activities of INTS11 and CDK9
Source: eLife journal article supplement (doi:10.7554/elife.92764), 2024-02-12
Supplement: fig1-figsupp1-data2 [file elife-92764-fig1-figsupp1-data2-v1.pdf]

Figure 1 – Figure supplement 1

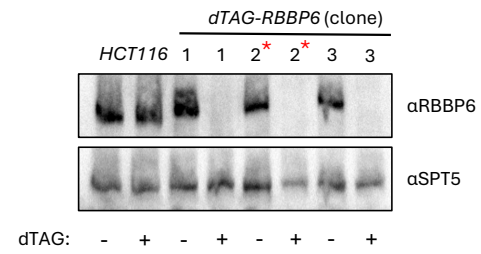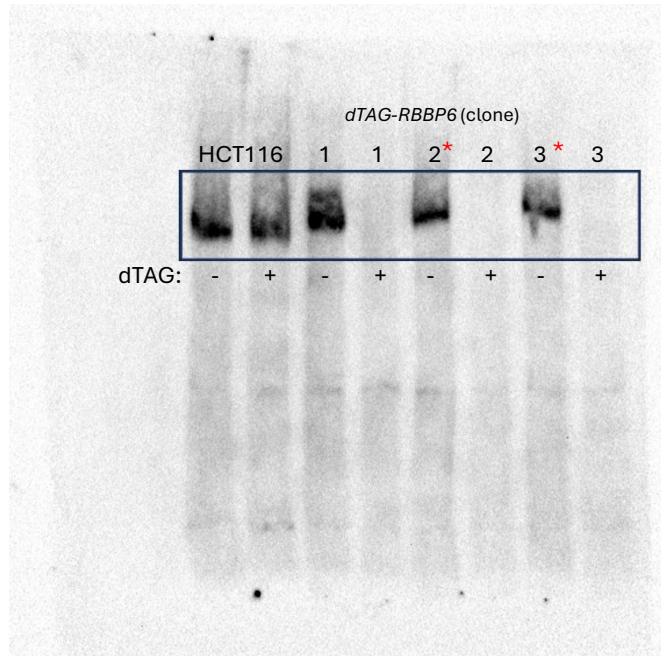

RBBP6

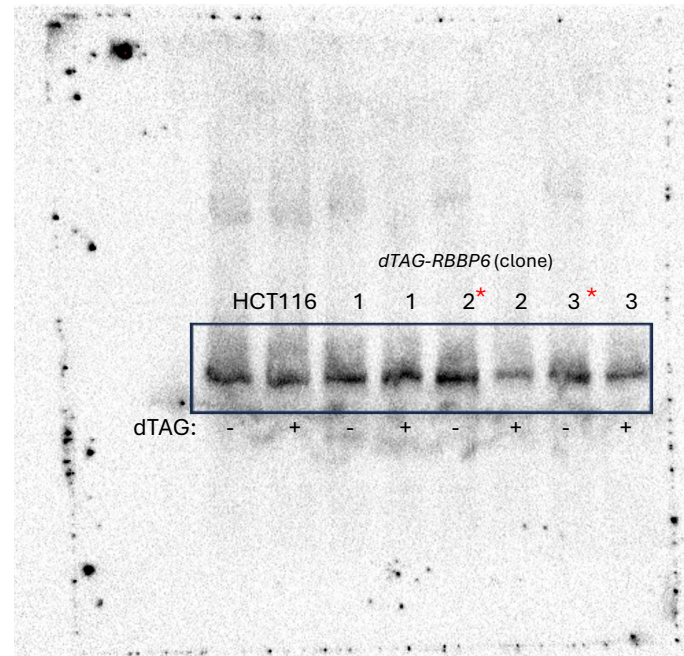

SPT5
